# Supplementary material for: Baseline T cell immune phenotypes predict virologic and disease control upon SARS-CoV infection
Source: PubMed Central journal article supplement — bioRxiv. 2020 Sep 21:2020.09.21.306837. Preprint. [Version 1] doi: 10.1101/2020.09.21.306837 (PMC7523117; doi:10.1101/2020.09.21.306837), 2020-09-21
Supplement: NIHPP2020.09.21.306837-supplement-1.pdf [file NIHPP2020.09.21.306837-supplement-1.pdf]

| <b>Supplemental Table 1. CC F1 lines in infection and disease categories</b> |                      |                      |              |
|------------------------------------------------------------------------------|----------------------|----------------------|--------------|
| <b>RIX Line</b>                                                              | <b>d2 Viral Load</b> | <b>D4 Viral Load</b> | <b>Group</b> |
| CC042xCC019                                                                  | 0                    | 847                  | Low titer    |
| CC030xCC061                                                                  | 33                   | 333                  | Low titer    |
| CC018xCC065                                                                  | 683                  | N/A                  | Low titer    |
| CC030xCC023                                                                  | 700                  | 0                    | Low titer    |
| CC052xCC014                                                                  | 6333                 | 233                  | Low titer    |
| CC012xCC032                                                                  | 46333                | 233                  | Low titer    |
| CC032xCC013                                                                  | 46667                | 67                   | Low titer    |
| CC011xCC032                                                                  | 91500                | 0                    | Low titer    |
| CC019xCC004                                                                  | 10200000             | 27000                | High titer   |
| CC068xCC043                                                                  | 10350000             | 105750               | High titer   |
| CC006xCC039                                                                  | 10366667             | 211000               | High titer   |
| CC057xCC052                                                                  | 11193333             | 28000                | High titer   |
| CC062xCC046                                                                  | 11333333             | 114667               | High titer   |
| CC029xCC071                                                                  | 12166667             | 577500               | High titer   |
| CC060xCC037                                                                  | 13200000             | 14470                | High titer   |
| CC041xCC016                                                                  | 14100000             | 120700               | High titer   |
| CC028xCC024                                                                  | 14650000             | 2966667              | High titer   |
| CC065xCC010                                                                  | 14683333             | 330667               | High titer   |
| CC001xCC055                                                                  | 14800000             | N/A                  | High titer   |
| CC013xCC041                                                                  | 15366667             | 172500               | High titer   |
| CC074xCC058                                                                  | 16800000             | 128667               | High titer   |
| CC004xCC011                                                                  | 16816667             | 1003333              | High titer   |
| CC026xCC034                                                                  | 17500000             | 175667               | High titer   |
| CC061xCC025                                                                  | 18200000             | 192667               | High titer   |
| CC016xCC038                                                                  | 18666667             | 116000               | High titer   |
| CC056xCC033                                                                  | 20333333             | 300033               | High titer   |
| CC033xCC046                                                                  | 21000000             | 409667               | High titer   |
| CC025xCC028                                                                  | 23166667             | 640333               | High titer   |
| CC042xCC025                                                                  | 23666667             | N/A                  | High titer   |
| CC015xCC059                                                                  | 26000000             | 80000                | High titer   |
| CC055xCC006                                                                  | 37333367             | N/A                  | High titer   |
| CC055xCC028                                                                  | 47566667             | 33                   | High titer   |
| CC018xCC065                                                                  | 683                  | 8400                 | LID          |
| CC032xCC013                                                                  | 46667                | 67                   | LID          |
| CC030xCC023                                                                  | 700                  | 0                    | LID          |
| CC030xCC023                                                                  | 33                   | 333                  | LID          |
| CC052xCC014                                                                  | 6333                 | 233                  | LID          |
| CC001xCC074                                                                  | 3686667              | 688833               | HID          |
| CC074xCC058                                                                  | 16800000             | 128667               | HID          |
| CC025xCC028                                                                  | 23166667             | 640333               | HID          |
| CC061xCC025                                                                  | 18200000             | 192667               | HID          |
| CC013xCC041                                                                  | 15366667             | 172500               | NDHT         |
| CC016xCC038                                                                  | 18666667             | 116000               | NDHT         |
| CC033xCC046                                                                  | 21000000             | 409667               | NDHT         |
| CC074xCC058                                                                  | 16800000             | 128667               | DHT          |
| CC025xCC028                                                                  | 23166667             | 640333               | DHT          |
| CC061xCC025                                                                  | 18200000             | 192667               | DHT          |
